# Supplementary material for: One-pot synthesis of Ag@Cu yolk–shell nanostructures and their application as non-enzymatic glucose biosensors
Source: Royal Society of Chemistry journal article supplement (doi:10.1039/c4ce01074d), 2014-01-01
Supplement: c4ce01074d1.pdf [file c4ce01074d1.pdf]

## Supporting Information

### One-pot synthesis of Ag@Cu yolk-shell nanostructures and their application as nonenzymatic glucose biosensor

Shuling Xu<sup>a</sup>, Haibo Li<sup>a</sup>, Lei Wang<sup>a</sup>, Qiaoli Yue<sup>a</sup>, Sun Sixiu<sup>b</sup> and Jifeng Liu<sup>a</sup>

<sup>a</sup> Department of Chemistry, Liaocheng University, Liaocheng 252059, PR China

<sup>b</sup> Department of Chemistry, Shandong University, Jinan, Shandong 250100, PR China

E-mail: liujifeng111@gmail.com

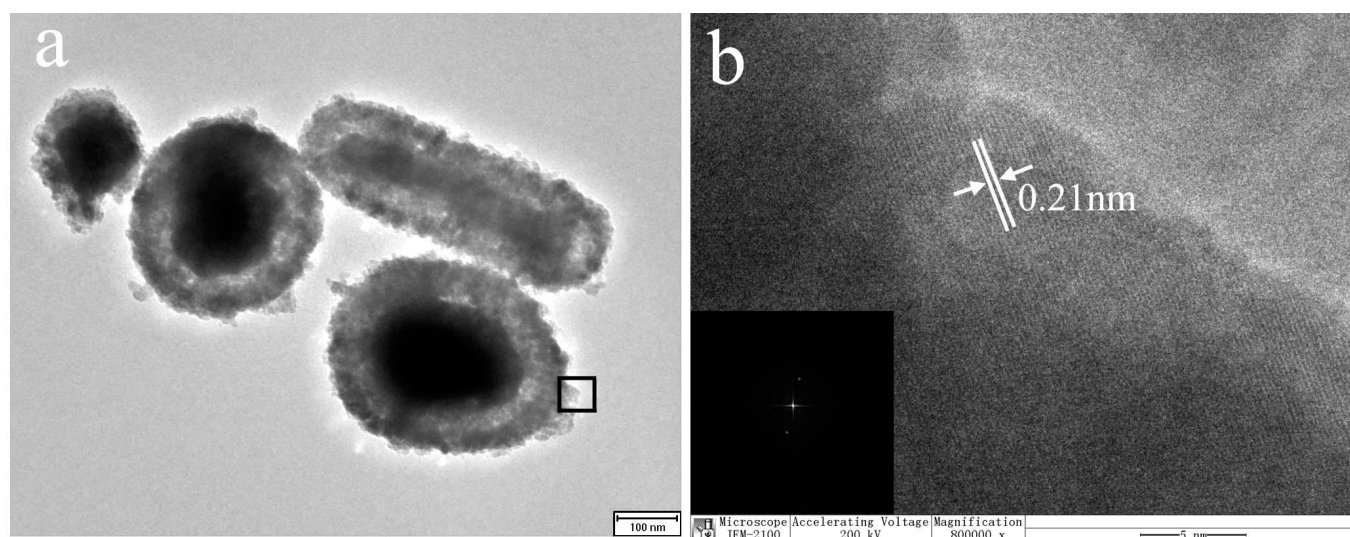

**Fig. S1** (a) TEM image of the Ag@Cu yolk-shell nanostructure. (b) HRTEM image recorded from the edge of a yolk-shell nanostructure, framed area in (a). The insets in (b) show the corresponding Fourier transform (FFT) of the HRTEM images

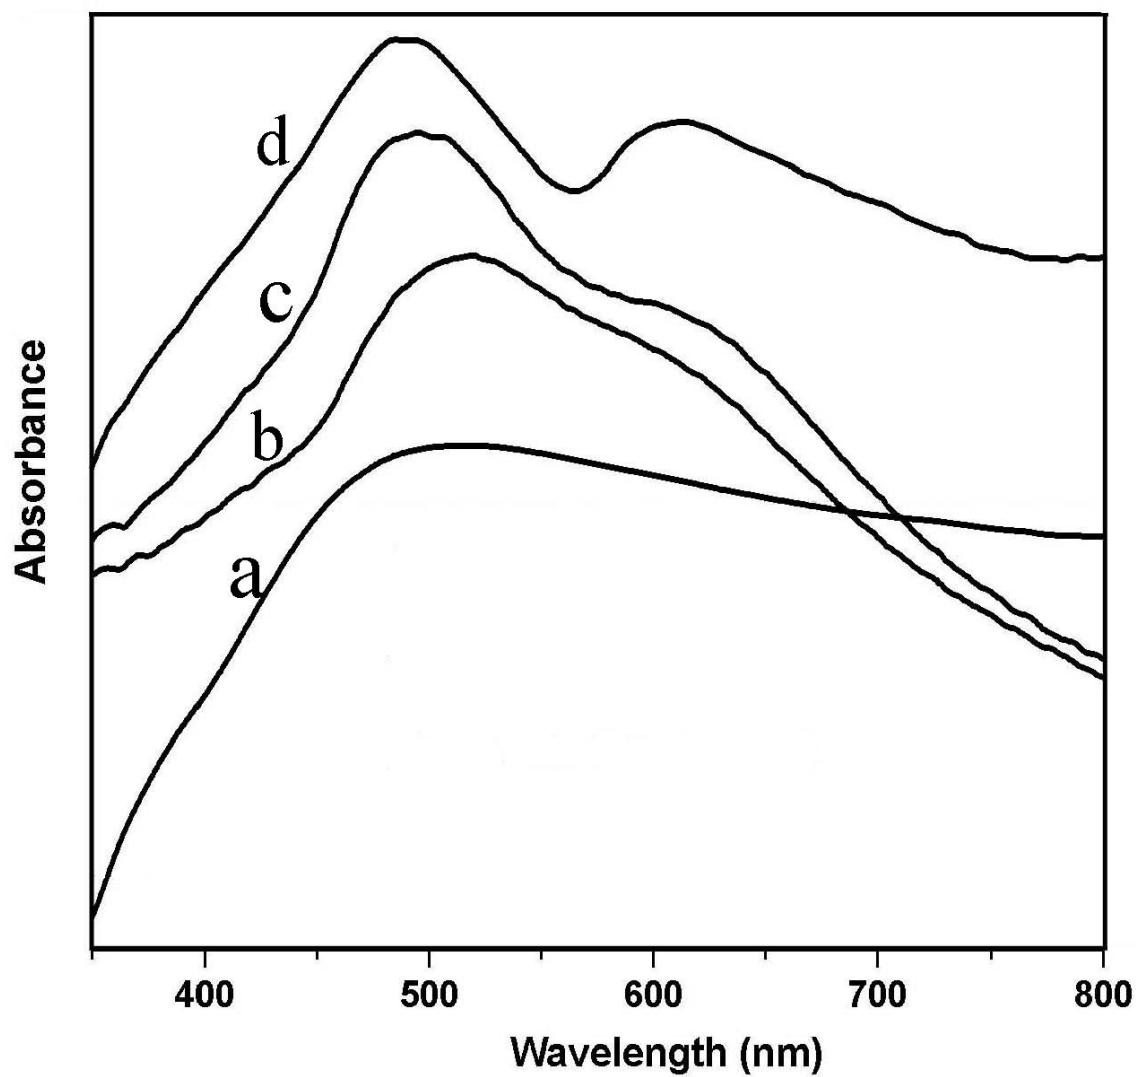

**Fig. S2.** UV - vis spectral sequences of nanoparticles obtained at 160°C after different reaction times: (a) 4 h; (b) 10 h; (c) 18; (d) 24h.

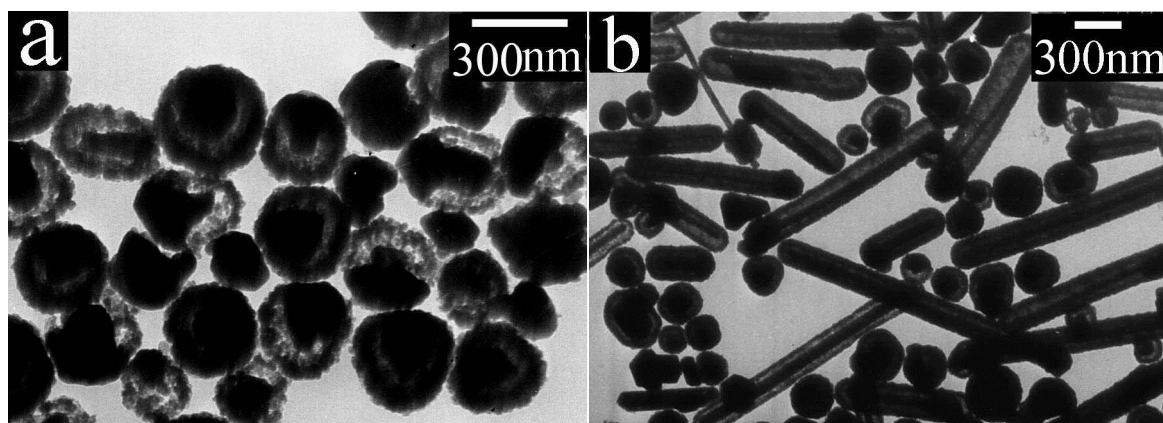

**Fig. S3.** TEM images of the Ag@Cu yolk-shell nanostructures prepared at PVP (a) 0g and (b) 0.02g .
